# Supplementary material for: Lattice Defects Engineering in W-, Zr-doped BiVO4 by Flame Spray Pyrolysis: Enhancing Photocatalytic O2 Evolution
Source: MDPI journal article supplement (doi:10.3390/nano11020501), 2021-02-16
Supplement: s1 [file s1]

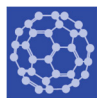

## Article

# Lattice Defects Engineering in W-, Zr-doped $\text{BiVO}_4$ by Flame Spray Pyrolysis: Enhancing Photocatalytic $\text{O}_2$ Evolution

Panagiota Stathi, Maria Solakidou and Yiannis Deligiannakis \*

Laboratory of Physics Chemistry of Materials & Environment, Department of Physics, University of Ioannina, Ioannina, 45110, Greece; pstathi@cc.uoi.gr (P.S.); maria-sol@windowslive.com (M.S.)

\* Correspondence: ideligia@uoi.gr

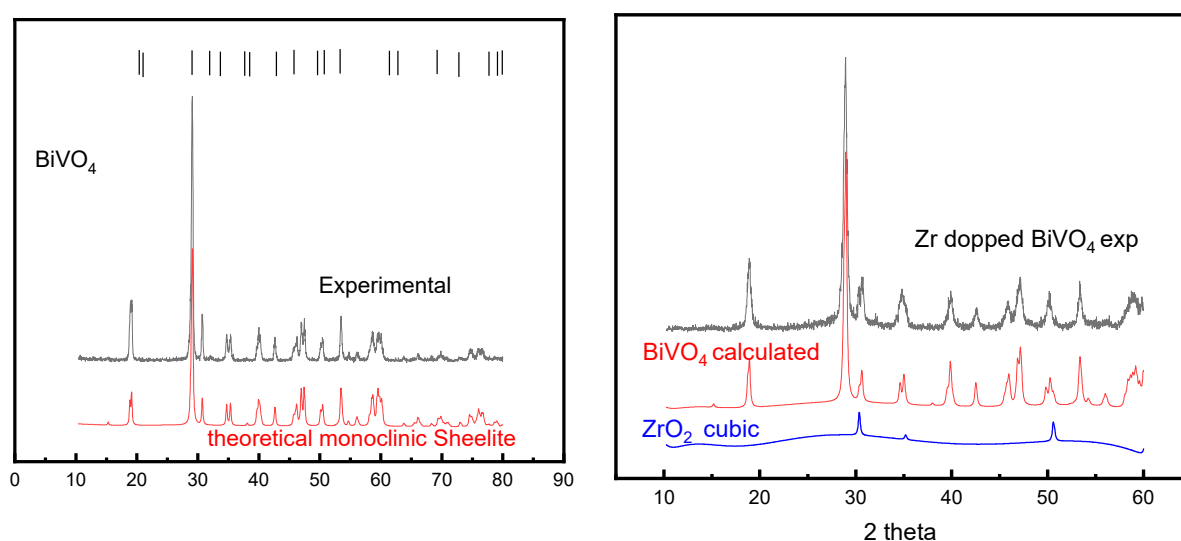

**Figure S1.** Theoretical analysis of XRD patterns of  $\text{BiVO}_4$  and  $\text{Zr-BiVO}_4$ .

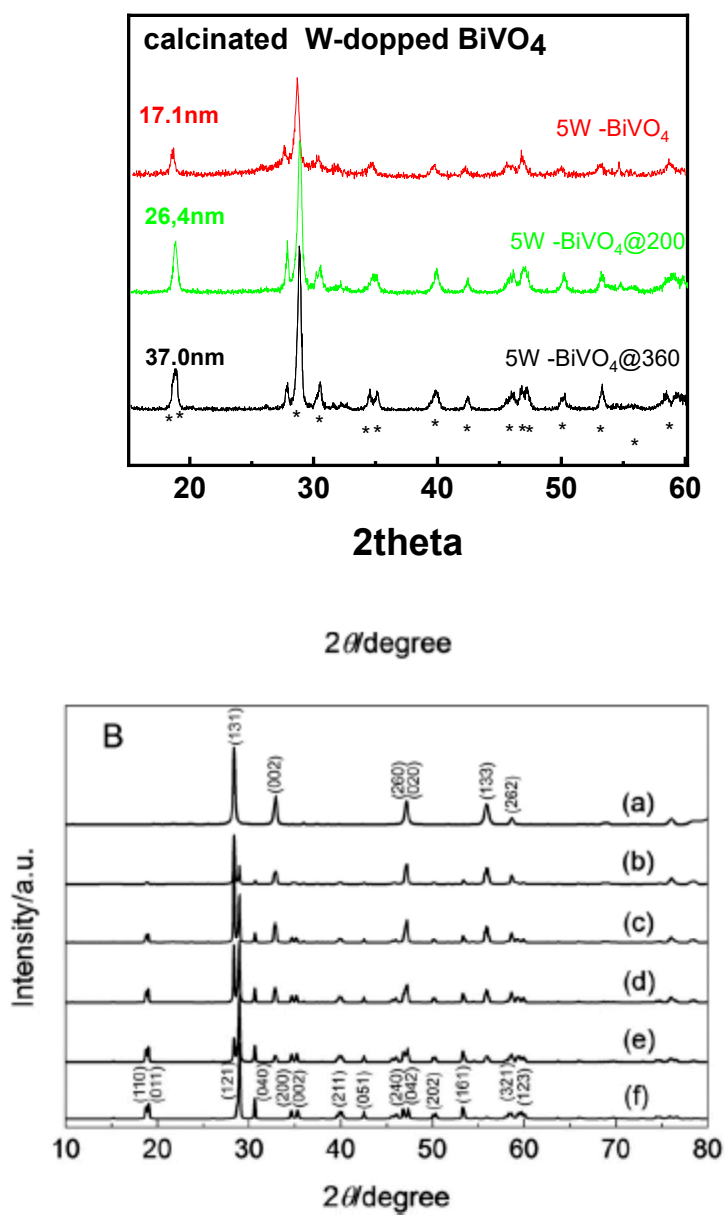

Figure S2. XRD pattern of calcined W-doped  $\text{BiVO}_4$ .

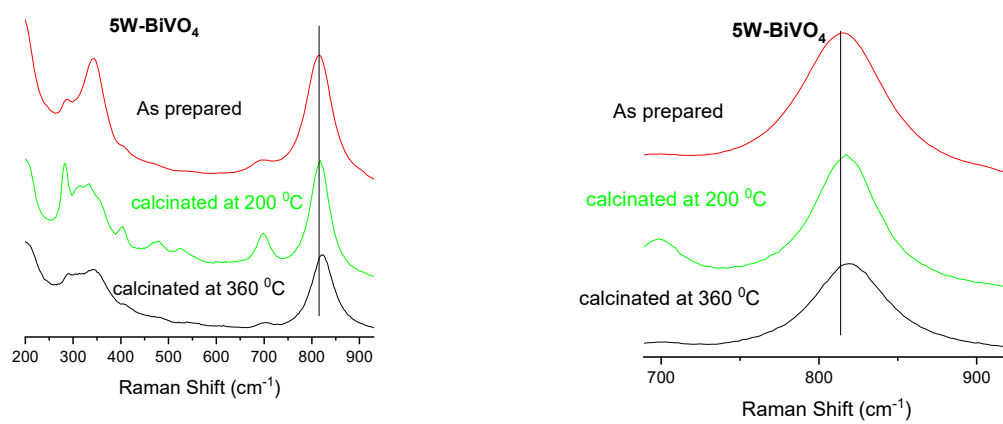

**Figure S3.** Raman spectra of calcined W-doped BiVO<sub>4</sub>.
